# Supplementary material for: A polymeric ionic liquid as a cathode interlayer of organic photovoltaics with improved reproducibility
Source: Royal Society of Chemistry journal article supplement (doi:10.1039/c8cc10222h), 2019-01-01
Supplement: c8cc10222h1.pdf [file c8cc10222h1.pdf]

## Electronic Supplementary Information

### **Polymeric Ionic Liquid as Cathode Interlayer of Organic Photovoltaics with Improved Reproducibility**

Chunhua Li,<sup>a,b</sup> Xuan Liu,<sup>a,c</sup> Dandan Tu,<sup>a,c</sup> Qing Yang,<sup>a,c</sup> Xuegang Chen,<sup>b,\*</sup> Can Li,<sup>a</sup> Xin Guo<sup>a\*</sup>

<sup>a</sup> State Key Laboratory of Catalysis, Dalian Institute of Chemical Physics, Chinese Academy of Sciences, Dalian National Laboratory for Clean Energy, Zhongshan Road 457, Dalian 116023, China

<sup>b</sup> Key Laboratory of Rubber-Plastic of Ministry of Education (QUST), Shandong Provincial Key Laboratory of Rubber-plastics, School of Polymer Science and Engineering, Qingdao University of Science and Technology, Qingdao, 266042, China

<sup>c</sup> University of Chinese Academy of Sciences, Beijing 100049, China

Email: [guoxin@dicp.ac.cn](mailto:guoxin@dicp.ac.cn); [xgchen@qust.edu.cn](mailto:xgchen@qust.edu.cn)

### **Experimental Section**

*Materials and methods:* The PTB7-Th and the (6,6)-Phenyl-C<sub>71</sub>-butyric acid methyl ester (PC<sub>71</sub>BM) were purchased from Solarmer Materials Inc. Other materials were purchased from Adamas, Aldrich, and Alfa and used without any further purification. <sup>1</sup>H NMR (400 MHz) spectra were measured on a Bruker 400 MHz AVANCE III with tetramethylsilane as an internal reference. The molecular weight was measured by the GPC on the Waters 1525 (Agilent PLgel 5 μm MIXED-C column) with polystyrene as the standard and DMF as the eluent. Tapping-mode AFM images, thickness of film and work function data were obtained by using a scanning probe microscope and scanning Kelvin probe microscopy (SKPM) on a Bruker Metrology Nanoscope III-D. Electrochemical impedance spectroscopy (EIS) was measured by using an electrochemical workstation (CHI600D) with a frequency range from 1 Hz to 10 MHz in dark environment. SEM images were taken by a Quanta 200F microscope (FEI

Company) with an accelerating voltage of 20 kV. The thermal property of the polymer was characterized on SETSYS 16/18, SETARAM, France. The molecular weight was measured by the GPC on the Waters 1525 (Agilent PLgel 5  $\mu\text{m}$  MIXED-C column) with the polystyrene as the standard and the DMF as the eluent.

*Device fabrication and characterization:* Photovoltaic devices were fabricated with a structure of glass/ITO/PEDOT:PSS/PTB7-Th:PC<sub>71</sub>BM/CIL/Al. The ITO-coated glass substrates were cleaned by deionized water, acetone, and isopropyl alcohol under ultrasonication for 15 min each and followed by a UV ozone treatment for 10 min. Then, PEDOT:PSS layer was spin-coated on the cleaned ITO surface. After being baked at 150 °C for 20 min, the active layer was spin-coated from a PTB7-Th/PC<sub>71</sub>BM (12 mg/mL, 1:1.5, w/w) in CB solution with 3% DIO at 1500 rpm for 1 min. The CIL was spin-coated in methanol solution at 4000 rpm for 30 s. Finally, a 75 nm Al layer were deposited on the active layer. The *J-V* measurement was performed via the solar simulator (SS-F5-3A, Enlitech) along with AM 1.5G spectra whose intensity was calibrated by the certified standard silicon solar cell (SRC-2020, Enlitech) at 100 mV cm<sup>-2</sup>. The external quantum efficiency (EQE) data were obtained by using the solar-cell spectral-response measurement system (QE-R, Enlitech).

*Synthesis of the polymeric ionic liquid (PIL):* 1-Vinyl-3-butylimidazolium bromide (MIL, 1.190 g, 5.148 mmol) and AIBN (0.015 g, 0.091 mmol) as the initiator were placed into a 100 mL round-bottom flask then 20 mL chloroform was added. The polymerization was kept at 70 °C for 3.5 h in argon atmosphere. The polymer was precipitated in hexane and washed with hexane for three times. The product was

obtained as white solid by drying under vacuum in 70 °C for 12 h (0.923 g, 77.5%).

$^1\text{H}$  NMR (400 MHz,  $\text{CDCl}_3$ ):  $\delta$  10.43-9.20 (m, 1H), 8.89-7.82 (m, 1H), 7.27-6.77 (m, 1H), 5.51-4.49 (m, 1H), 4.41-4.13 (m, 2H), 2.65-2.25 (m, 2H), 2.06-1.83 (m, 2H), 1.52-1.36 (m, 2H), 0.994-0.875 (m, 3H).  $M_n=34.8$  kg/mol, PDI=1.91.

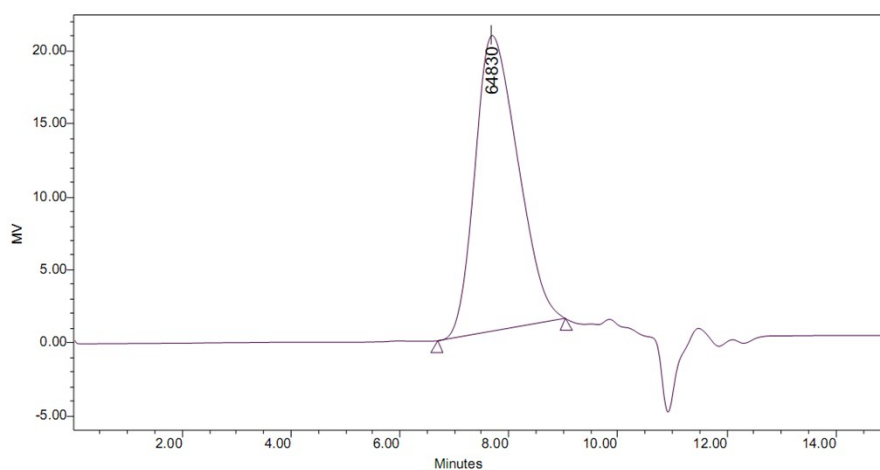

**Figure S1.** GPC curve of the PIL.

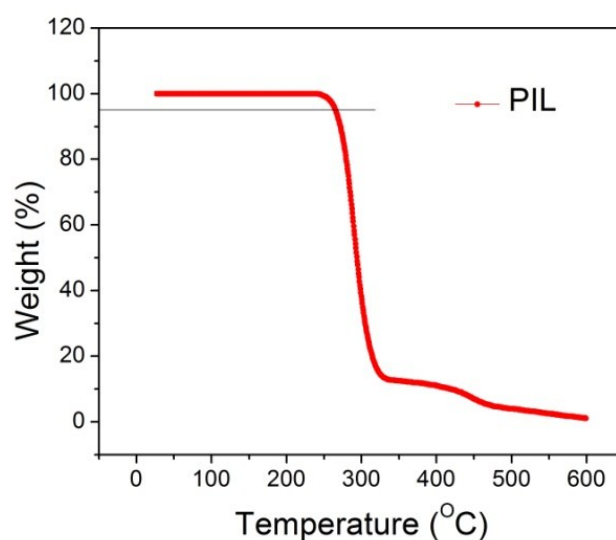

**Figure S2.** TGA curve of the PIL (heating rate:  $10\text{ °C min}^{-1}$  in nitrogen atmosphere).

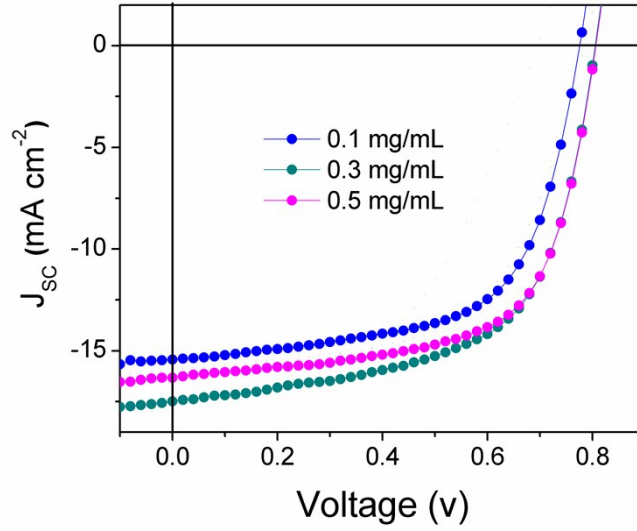

**Figure S3.**  $J$ - $V$  curves of PIL-based devices with different concentrations of PIL in methanol.

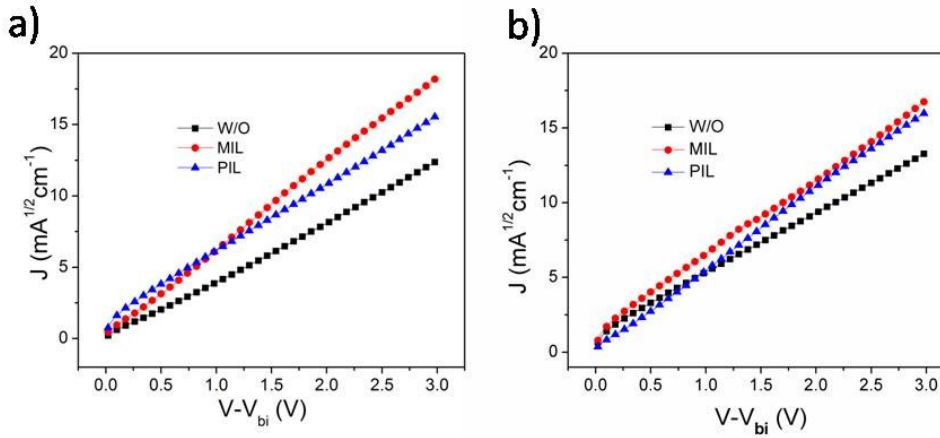

**Figure S4.**  $J^{1/2}$ - $V$  fitting results of a) electron-only and b) hole-only devices for the mobility measurement using the SCLC model. The electron-only device structure for the mobility measurement is ITO/ZnO/PTB7-Th:PC71BM/MIL or PIL/Al. The hole-only device structure for the mobility measurement is ITO/PEDOT:PSS/PTB7-Th:PC71BM/MIL or PIL/Ag.

**Table S1.** Performances of devices based on the PIL spin-coated from different concentrations of PIL in methanol.

| PIL in methanol | Thickness | $J_{SC}$ (mA/cm <sup>2</sup> ) | $V_{OC}$ (V) | FF (%) | PCE (%)                  |
|-----------------|-----------|--------------------------------|--------------|--------|--------------------------|
| 0.1 mg/mL       | ---       | 16.37                          | 0.781        | 61.2   | 8.11 (8.02) <sup>a</sup> |
| 0.3 mg/mL       | 2-3 nm    | 17.12                          | 0.802        | 65.3   | 9.04 (8.66)              |
| 0.5 mg/mL       | ~5 nm     | 15.94                          | 0.797        | 64.7   | 8.59 (8.37)              |

<sup>a</sup> Average PCEs obtained from 20 cells are shown in parentheses.

**Table S2.** Mobilities of the electron-only and hole-only devices with MIL and PIL as the interlayer, respectively.

| Interlayer | $\mu_e$ (cm <sup>2</sup> V <sup>-1</sup> S <sup>-1</sup> ) | $\mu_h$ (cm <sup>2</sup> V <sup>-1</sup> S <sup>-1</sup> ) | $\mu_e/\mu_h$ |
|------------|------------------------------------------------------------|------------------------------------------------------------|---------------|
| MIL        | $1.15 \times 10^{-3}$                                      | $6.92 \times 10^{-4}$                                      | 1.66          |
| PIL        | $8.03 \times 10^{-4}$                                      | $6.69 \times 10^{-4}$                                      | 1.20          |

<sup>a</sup> Electron-only device structure for the mobility measurement: ITO/ZnO/PTB7-Th:PC<sub>71</sub>BM/MIL or PIL/Al.

<sup>b</sup> Hole-only device structure for the mobility measurement: ITO/PEDOT:PSS/PTB7-Th:PC<sub>71</sub>BM/MIL or PIL/Ag.
